# Supplementary material
Source: publisher site journal article supplement (https://www.dovepress.com/article/606394)
Supplement: Supplementary file 1 [file 606394%20Revised%20Supplementary%20Materials.docx]

A

B

C

D

E

F

G

H

I

J

Supplementary Fig. S1. Lymphocyte subsets at three time points between groups.

(A) Lymphocytes, (B) CD3+ T cells, (C) CD4+ T cells, (D) CD8+ T cells, (E) CD4+/CD8+ T cell ratio, (F) NK cells, (G) B cells, (H) NKT cells, (I) CD4+CD25+CD127- Tregs, and (J) CD4+CD25+ Tregs. Data are presented as mean ± SD. **P*＜0.05.


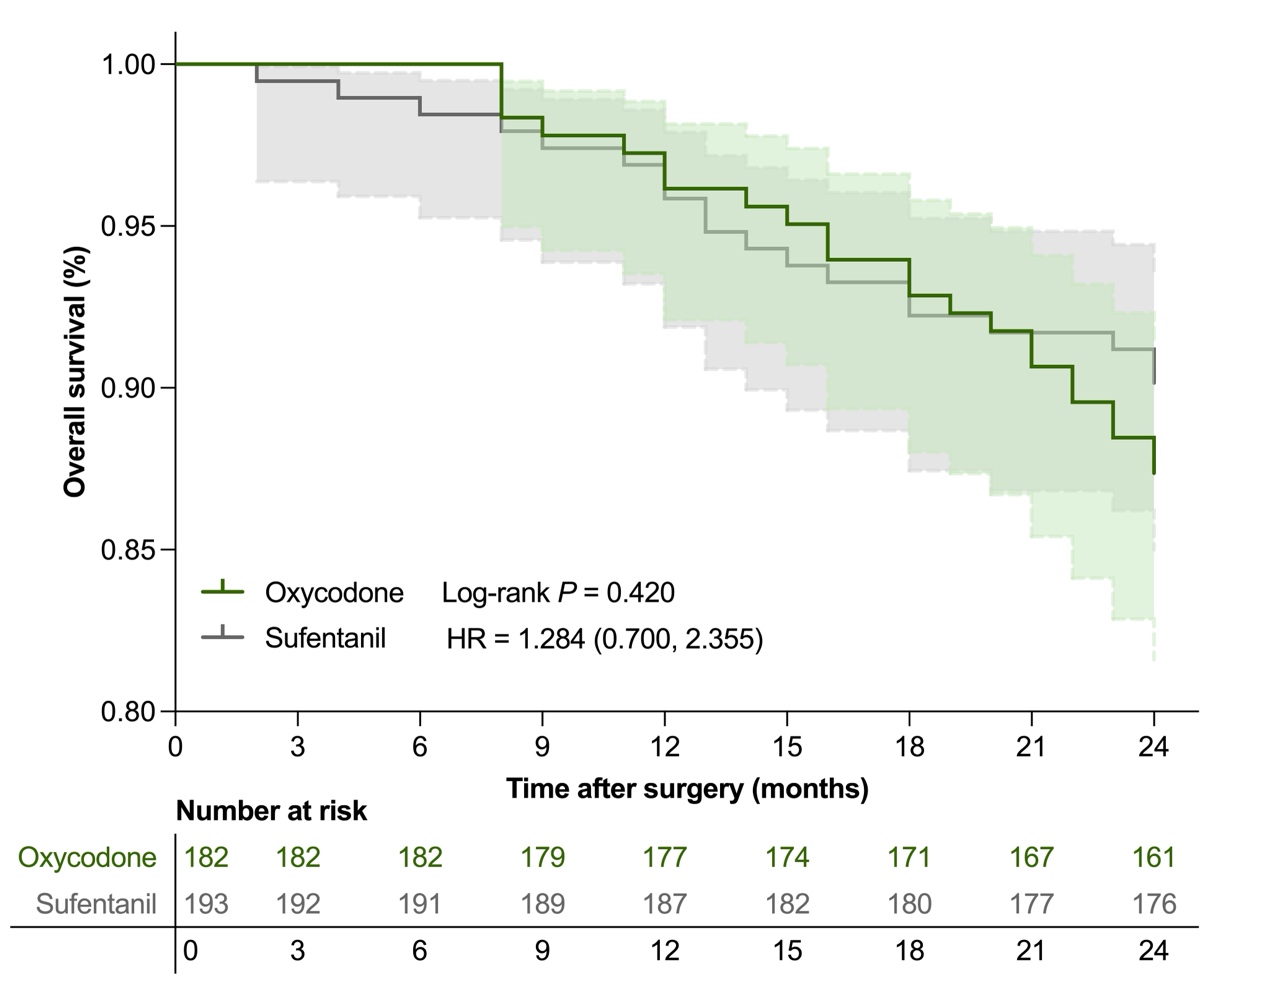


Supplementary Fig. S2. Kaplan‑Meier curves comparing 2‑year overall survival between the oxycodone‑based PCIA and sufentanil‑based PCIA groups.

HR, hazard ratio.
